# Supplementary material for: Impaired Thermogenesis and a Molecular Signature for Brown Adipose Tissue inId2Null Mice
Source: Hindawi journal article supplement (doi:10.1155/2016/6785948), 2016-01-01
Supplement: f1 [file 6785948.f1.zip]

**Table S1**

**Regression analysis of time-of-day representative core body temperatures (day and night).**

| Normal ambient temperature (21°C) |        |                           |        |                           |        |                           |        |                           |
|-----------------------------------|--------|---------------------------|--------|---------------------------|--------|---------------------------|--------|---------------------------|
|                                   | Male   |                           |        |                           | Female |                           |        |                           |
|                                   | ZT5.5  |                           | ZT20.5 |                           | ZT5.5  |                           | ZT17.5 |                           |
|                                   | WT     | <i>Id2</i> <sup>-/-</sup> |
| y-intercept (°C)                  | 37.7   | 36.4                      | 37.1   | 37.1                      | 37.6   | 35.8                      | 37.5   | 35.9                      |
| R <sup>2</sup>                    | 0.06   | 0.001                     | 0.04   | 0.0001                    | 0.006  | 0.08                      | 0.006  | 0.21                      |
| Slope                             | -0.016 | -0.007                    | 0.021  | 0.002                     | -0.008 | 0.056                     | 0.009  | 0.093                     |
| Thermoneutral temperature (30°C)  |        |                           |        |                           |        |                           |        |                           |
|                                   | Male   |                           |        |                           | Female |                           |        |                           |
|                                   | ZT5.5  |                           | ZT17.5 |                           | ZT5.5  |                           | ZT17.5 |                           |
|                                   | WT     | <i>Id2</i> <sup>-/-</sup> |
| y-intercept (°C)                  | 38.2   | 37.9                      | 38.3   | 36.9                      | 38.1   | 36.9                      | 38.4   | 38.1                      |
| R <sup>2</sup>                    | 0.07   | 0.07                      | 0.02   | 0.02                      | 0.07   | 0.0001                    | 0.03   | 0.03                      |
| Slope                             | -0.027 | -0.045                    | -0.009 | -0.026                    | -0.039 | 0.003                     | -0.018 | -0.034                    |

Table S2

| Mice Body Weights (g) (Mean ± SEM)                                                                                                                              |                                 |              |                                 |                                                                                                                                              |                                  |              |                                  |
|-----------------------------------------------------------------------------------------------------------------------------------------------------------------|---------------------------------|--------------|---------------------------------|----------------------------------------------------------------------------------------------------------------------------------------------|----------------------------------|--------------|----------------------------------|
| iBAT Weight Experiment                                                                                                                                          |                                 |              |                                 | Temperature Experiment                                                                                                                       |                                  |              |                                  |
| Male                                                                                                                                                            |                                 | Female       |                                 | Male                                                                                                                                         |                                  | Female       |                                  |
| WT (n=15)                                                                                                                                                       | <i>Id2</i> <sup>-/-</sup> (n=7) | WT (n=10)    | <i>Id2</i> <sup>-/-</sup> (n=9) | WT (n=19)                                                                                                                                    | <i>Id2</i> <sup>-/-</sup> (n=20) | WT (n=17)    | <i>Id2</i> <sup>-/-</sup> (n=17) |
| 32.76 ± 1.03                                                                                                                                                    | 23.84 ± 0.64<br>***             | 25.84 ± 1.02 | 19.83 ± 1.66<br>**              | 31.72 ± 1.67                                                                                                                                 | 24.58 ± 1.25<br>***              | 21.65 ± 1.29 | 19.42 ± 0.94                     |
| Two-Factor ANOVA                                                                                                                                                |                                 |              |                                 |                                                                                                                                              |                                  |              |                                  |
| Genotype: <i>p</i> <0.001; Sex: <i>p</i> <0.001; Interaction: n.s.<br>Tukey post hoc tests for intra-sex differences,<br>** <i>p</i> <0.01, *** <i>p</i> <0.001 |                                 |              |                                 | Genotype: <i>p</i> <0.001; Sex: <i>p</i> <0.001; Interaction: n.s.<br>Tukey post hoc tests for intra-sex differences,<br>*** <i>p</i> <0.001 |                                  |              |                                  |
